# Supplementary material for: Fluoran salicylaldehyde hydrazone Zn(ii) complexes: reversible photochromic systems both in solution and in a solid matrix
Source: Royal Society of Chemistry journal article supplement (doi:10.1039/c7tc02437a), 2017-01-01
Supplement: c7tc02437a1.pdf [file c7tc02437a1.pdf]

# **Fluorane Salicylaldehyde Hydrazone Zn(II) Complex: Reversible Photochromic System both in Solution and in Solid Matrix**

Yuanyuan Li,<sup>a,b</sup> Kai Li,<sup>\*b,c</sup> Lili Wang,<sup>b</sup> Yanling He,<sup>b</sup> Juan He,<sup>a</sup> Hongwei Hou<sup>\*b</sup> and Ben Zhong Tang<sup>\*c</sup>

<sup>a</sup> College of Chemistry, Chemical and Environmental Engineering, Henan University of Technology, Henan 450001, P. R. China.

<sup>b</sup> College of Chemistry and Molecular Engineering, Zhengzhou University, Henan 450001, P. R. China.

<sup>c</sup> Department of Chemistry and Hong Kong Branch of Chinese National Engineering Research Center for Tissue Restoration and Reconstruction, The Hong Kong University of Science & Technology, Clear Water Bay, Kowloon, Hong Kong, China.

## **Contents**

|                                                                |           |
|----------------------------------------------------------------|-----------|
| <b>1. Selected spectra and data referred in the paper.....</b> | <b>S2</b> |
| <b>2. Caption of the video.....</b>                            | <b>S4</b> |
| <b>3. NMR spectra.....</b>                                     | <b>S5</b> |
| <b>4. ESI-MS spectra.....</b>                                  | <b>S9</b> |

# 1. Selected spectra and data referred in the paper

**Table S1.** The influence of light wavelengths on the color changes of **1-Zn**, **2-Zn** and **3-Zn**.

| Wavelength / nm             | 365     | 400     | 425     | 450 | 475 | 500 | 550 | 600 |
|-----------------------------|---------|---------|---------|-----|-----|-----|-----|-----|
| <b>Color change of 1-Zn</b> | Ye<br>s | Ye<br>s | Ye<br>s | No  | No  | No  | No  | No  |
| <b>Color change of 2-Zn</b> | Ye<br>s | Ye<br>s | Ye<br>s | No  | No  | No  | No  | No  |
| <b>Color change of 3-Zn</b> | Ye<br>s | Ye<br>s | Ye<br>s | No  | No  | No  | No  | No  |

**Table S2.** The fluorescence lifetimes and quantum yields fluorescence of **1-Zn**, **2-Zn** and **3-Zn** in solution before and after UV light irradiation.

|             | Lifetime in DCM / ns |            | Quantum yield in DCM / % |            |
|-------------|----------------------|------------|--------------------------|------------|
|             | Non-irradiated       | Irradiated | Non-irradiated           | Irradiated |
| <b>1-Zn</b> | 3.47                 | 3.05       | 8.17                     | 0.96       |
| <b>2-Zn</b> | 3.21                 | 3.06       | 18.36                    | 6.98       |
| <b>3-Zn</b> | 3.18                 | 2.95       | 11.99                    | 2.73       |

**Table S3.** The fluorescence lifetimes and fluorescence quantum yields of **1-Zn**, **2-Zn** and **3-Zn** in solid matrix before and after UV light irradiation.

|             | Lifetime / ns  |            | Quantum yield / % |            |
|-------------|----------------|------------|-------------------|------------|
|             | Non-irradiated | Irradiated | Non-irradiated    | Irradiated |
| <b>1-Zn</b> | 1.69           | 1.59       | 3.55              | 1.21       |
| <b>2-Zn</b> | 1.57           | 1.41       | 6.94              | 1.44       |
| <b>3-Zn</b> | 1.56           | 1.46       | 5.70              | 1.07       |

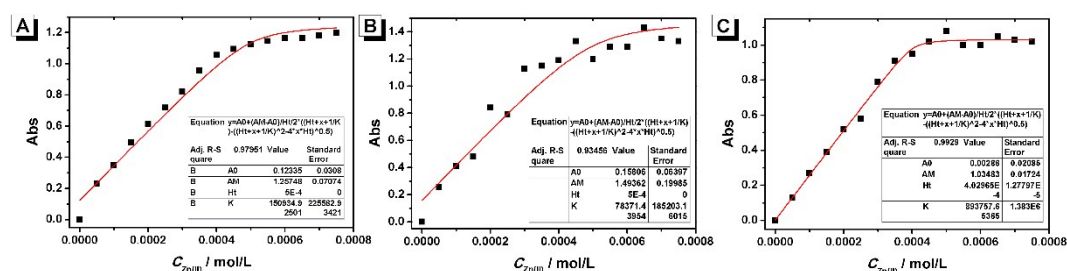

**Figure S1.** UV-Vis spectra titrations of the dyes of A) **1**, B) **2** and C) **3** to Zn(II) and their nonlinear fitting results. The absorbance wavelength was 615 nm, 494 nm and 585 nm, respectively. A0, AM, Ht and K in the figures represent the absorbance of dyes without Zn(II), the absorbance of dyes with excess Zn(II), the concentration of dyes and the binding constants between dyes and Zn(II), respectively. Conditions:  $[1] = [2] = [3] = 500 \mu\text{mol/L}$ ,  $[\text{Zn(II)}] = 0\text{-}750 \mu\text{mol/L}$ . 2 mm quartz cells were used in the experiments.

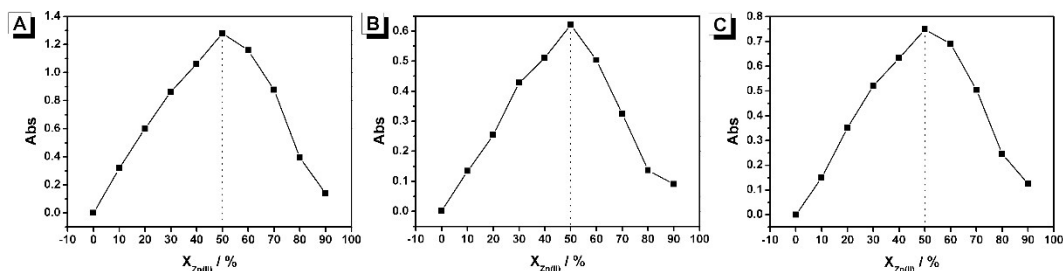

**Figure S2.** Job's plot method for evaluating the stoichiometry of the complexes. A) **1** with Zn(II), B) **2** with Zn(II) and C) **3** with Zn(II). The absorbance wavelength was 615 nm, 494 nm and 585 nm, respectively. The total concentrations of dyes and Zn(II) were 500  $\mu\text{mol/L}$ . 2 mm quartz cells were used in the experiments.

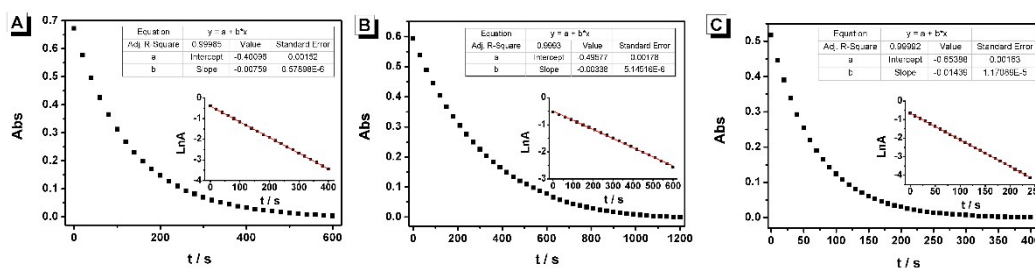

**Figure S3.** The thermal recovery kinetics of **1-Zn** in different solvents at 20 °C. Inset: The curves were fitted with one-order reaction dynamics ( $\ln A = -kt$ ).  $[1] = 500 \mu\text{mol/L}$ ,  $[\text{Zn(II)}] = 5 \text{ mmol/L}$ ,  $\lambda = 615 \text{ nm}$ .

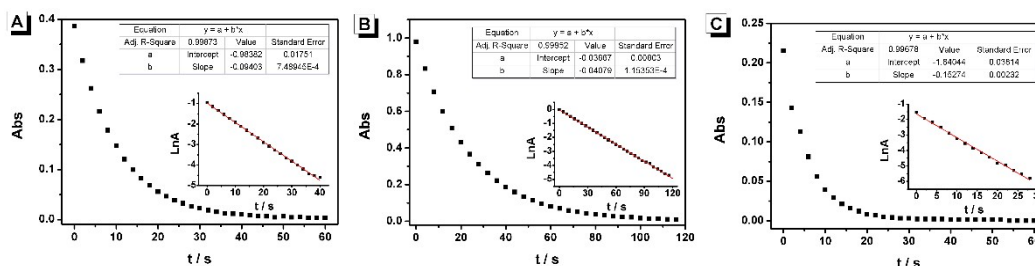

**Figure S4.** The thermal recovery kinetics of **2-Zn** in different solvents at 20 °C. Inset: The curves were fitted with one-order reaction dynamics ( $\ln A = -kt$ ).  $[2] = 500 \mu\text{mol/L}$ ,  $[\text{Zn(II)}] = 5 \text{ mmol/L}$ ,  $\lambda = 494 \text{ nm}$ .

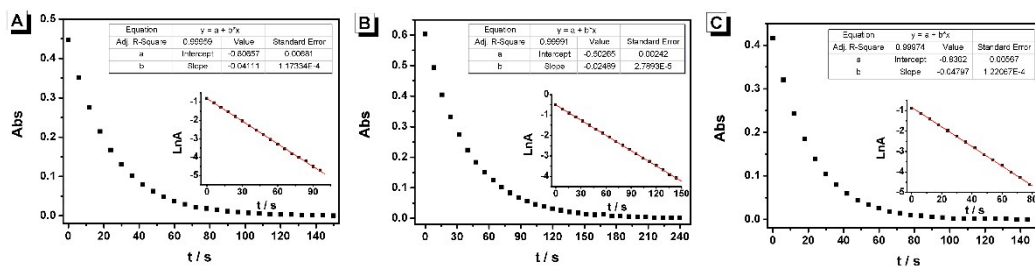

**Figure S5.** The thermal recovery kinetics of **3-Zn** in different solvents at 20 °C. Inset: The curves were fitted with one-order reaction dynamics ( $\ln A = -kt$ ).  $[3] = 500 \mu\text{mol/L}$ ,  $[\text{Zn(II)}] = 5 \text{ mmol/L}$ ,  $\lambda = 585 \text{ nm}$ .

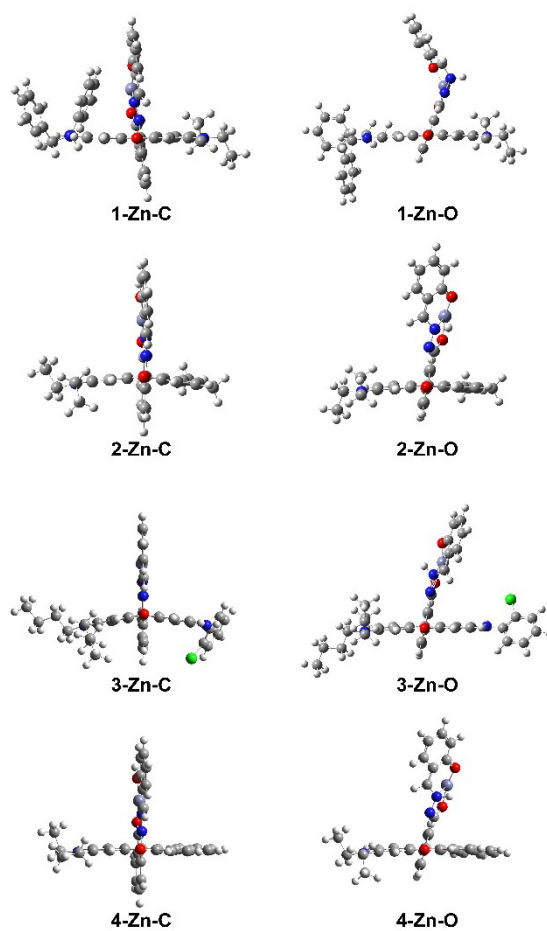

**Figure S6.** Stationary Born-Oppenheimer states of the complexes in different forms.

## 2. Caption of the video

**Video 1.** A video of letters recording on **1-Zn**, **2-Zn** and **3-Zn** in silica gel.  $[1] = [2] = [3] = 2 \mu\text{mol/g}$ ,  $[\text{Zn(II)}] = 200 \mu\text{mol/g}$ , the wavelength of laser is 405 nm.

### 3. NMR spectra

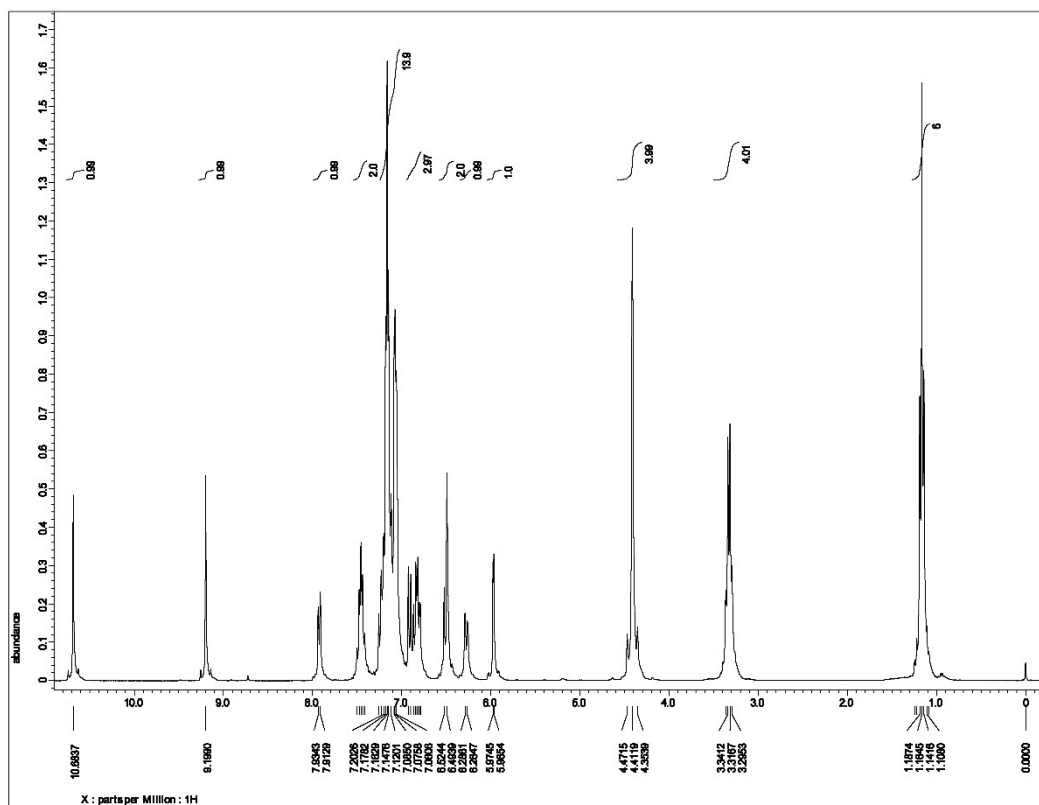

Figure S7. <sup>1</sup>H-NMR spectra of 1.

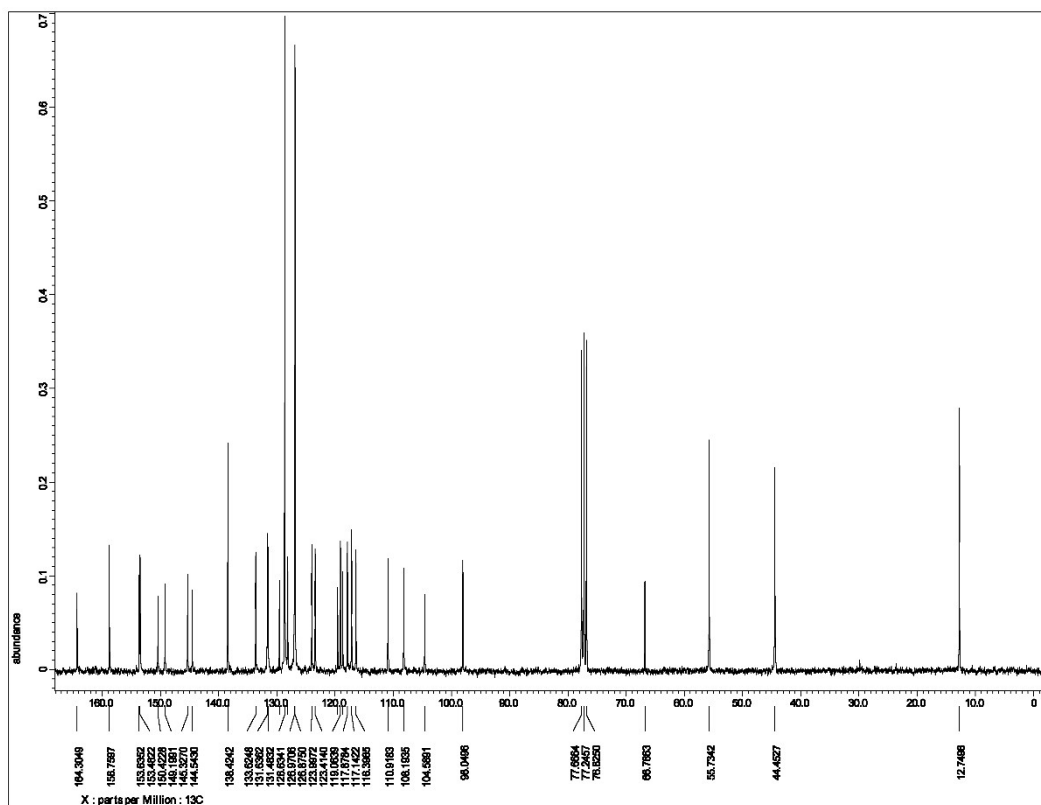

Figure S8. <sup>13</sup>C-NMR spectra of 1.

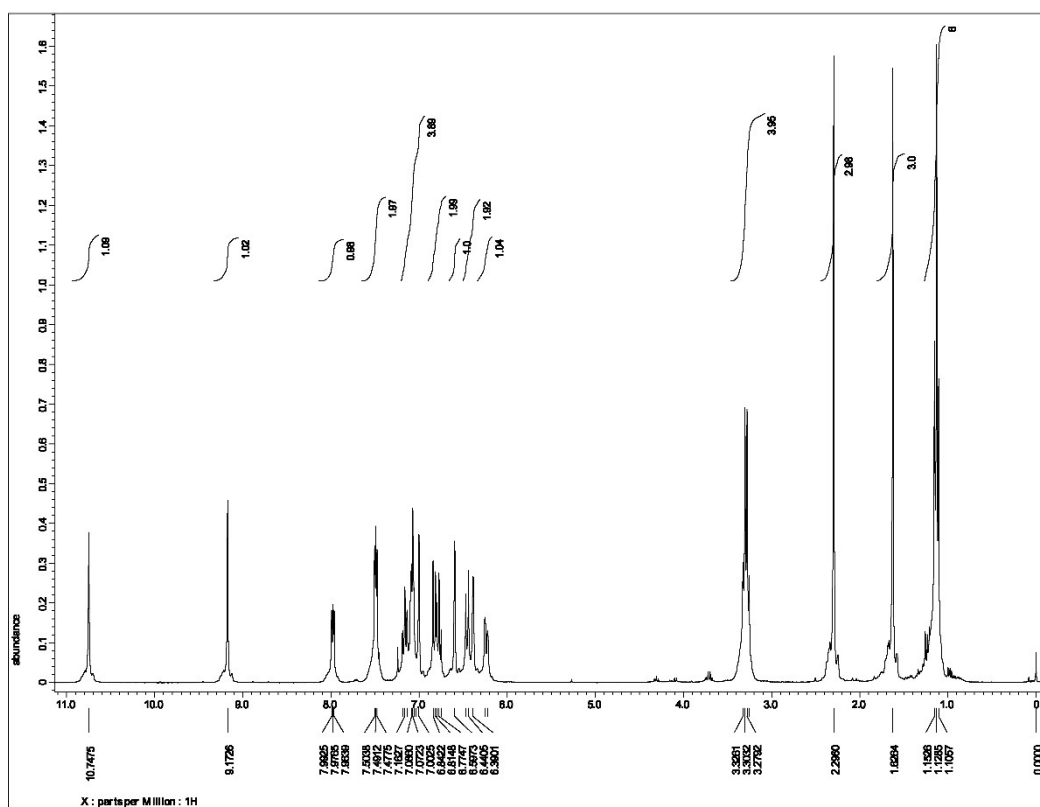

Figure S9.  $^1\text{H}$ -NMR spectra of **2**.

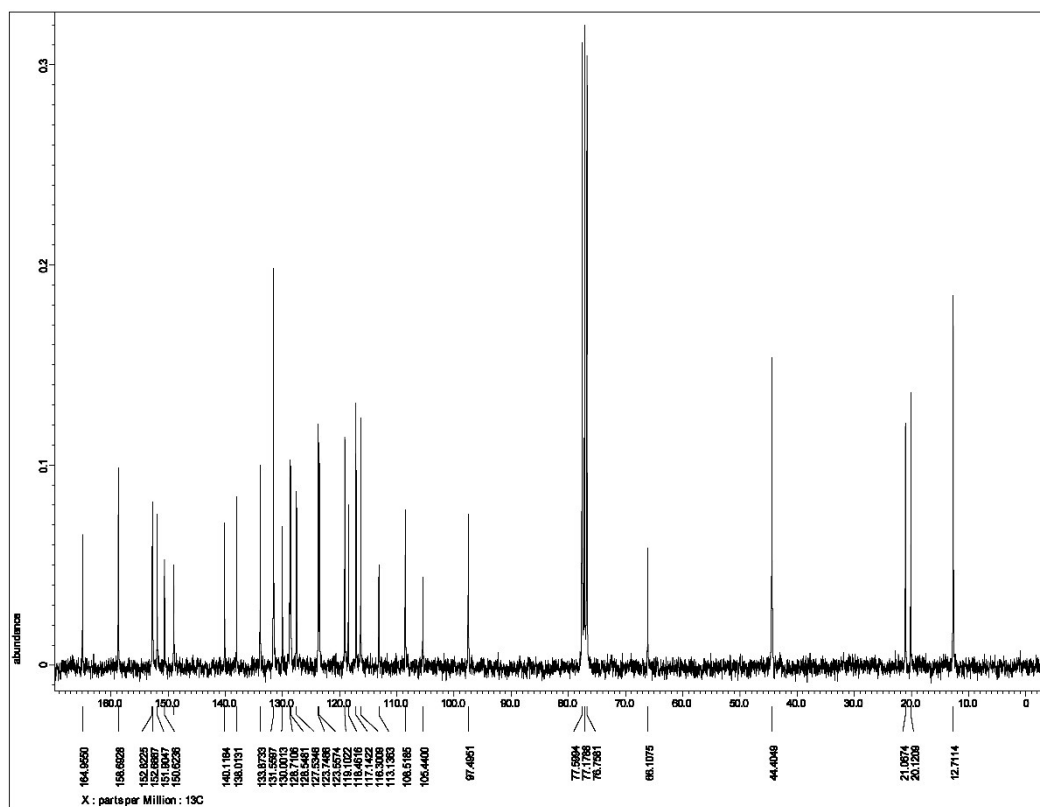

Figure S10.  $^{13}\text{C}$ -NMR spectra of **2**.

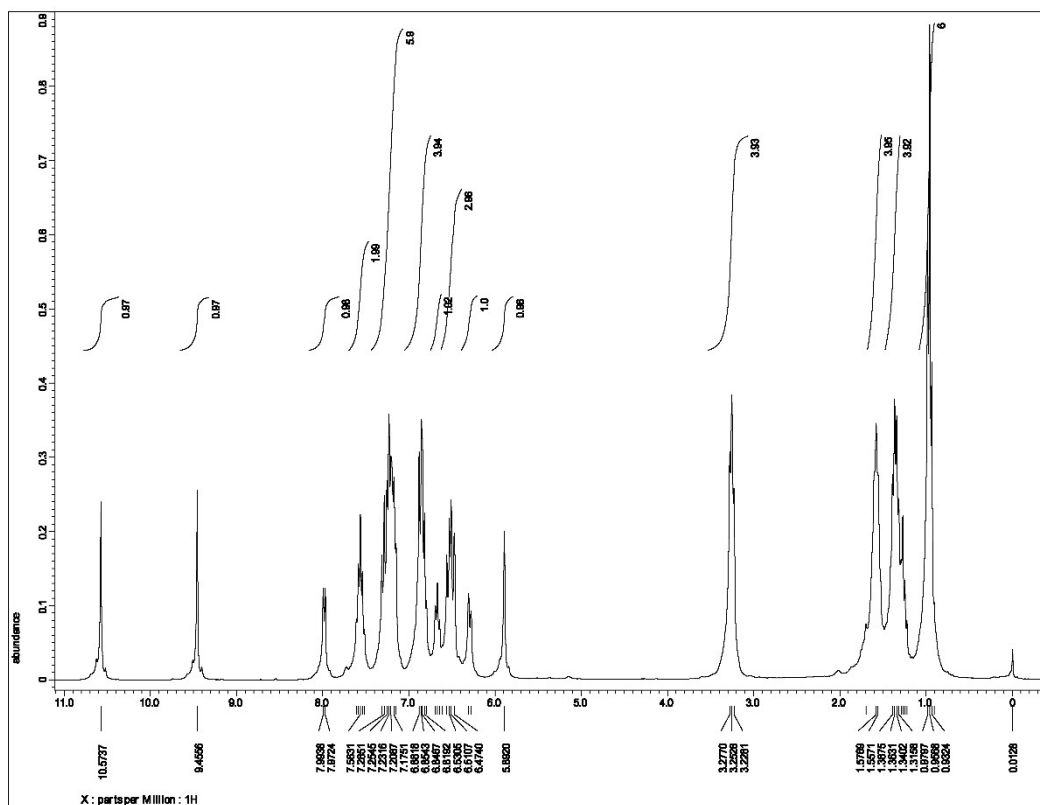

Figure S11. <sup>1</sup>H-NMR spectra of **3**.

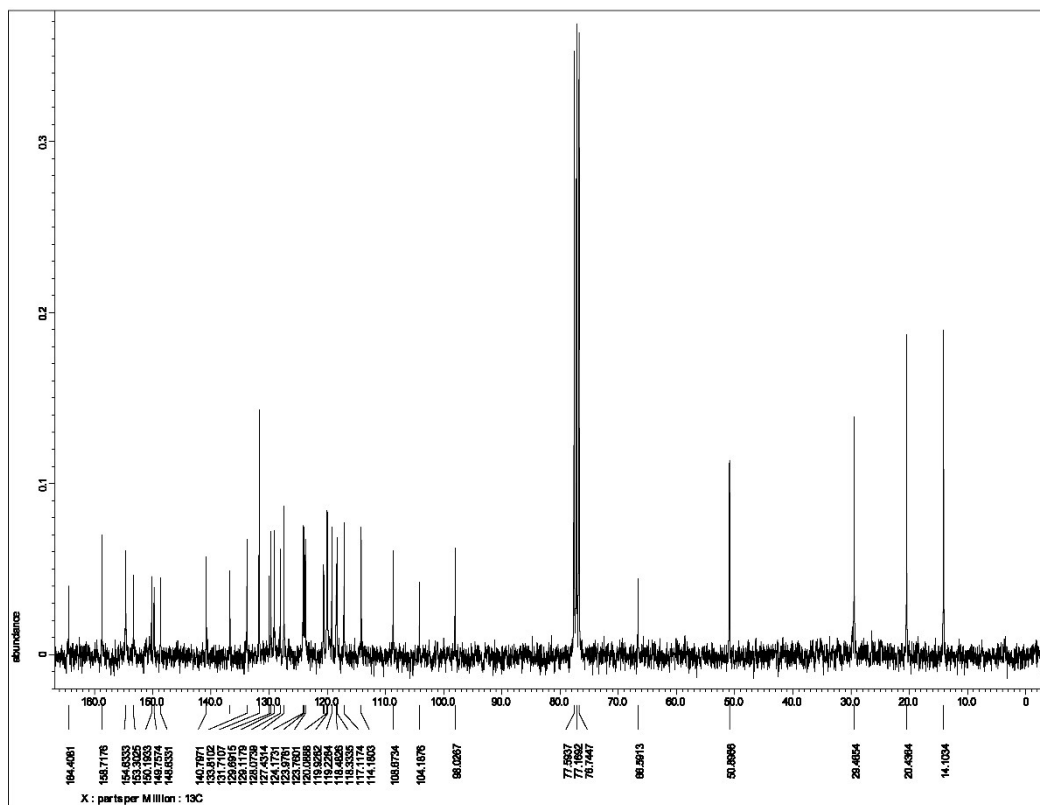

Figure S12. <sup>13</sup>C-NMR spectra of **3**.

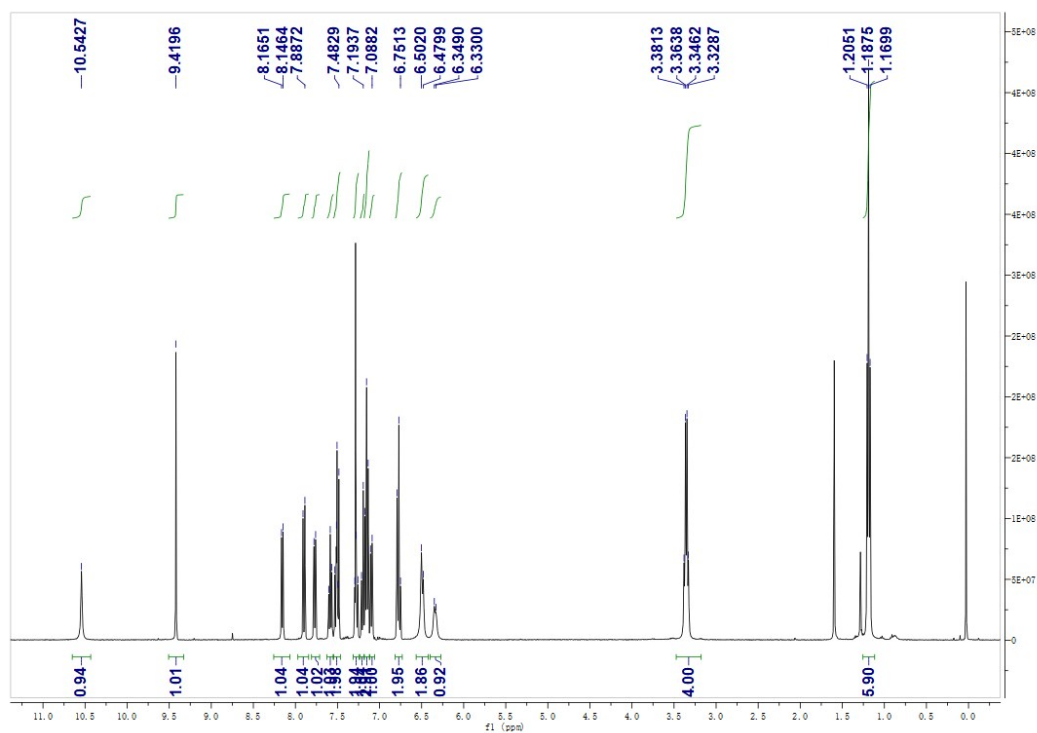

Figure S13.  $^1\text{H}$ -NMR spectra of 4.

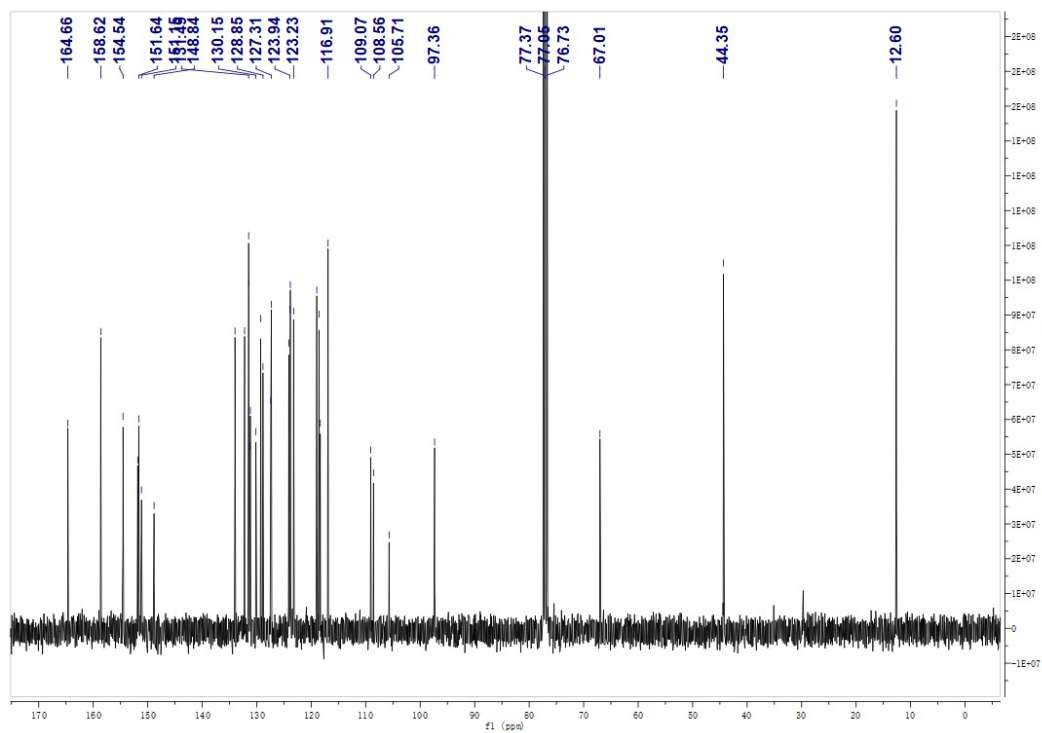

Figure S14.  $^{13}\text{C}$ -NMR spectra of 4.



#### 4. ESI-MS

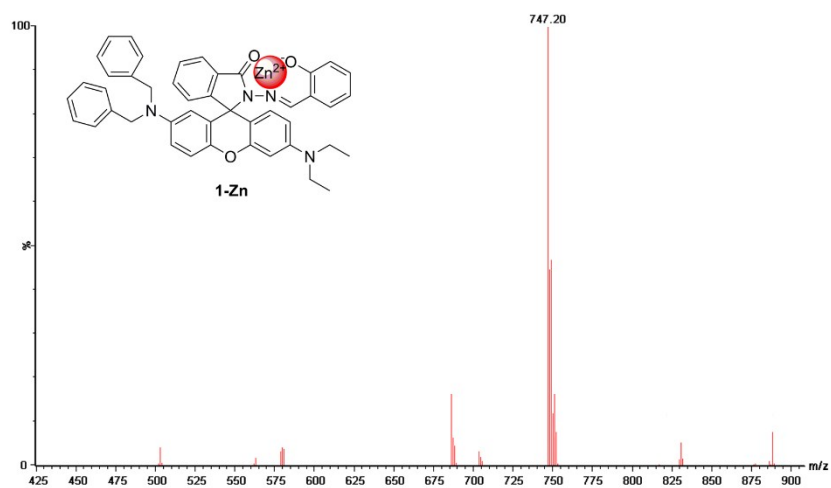

Figure S15. EMI-MS spectra of 1-Zn.

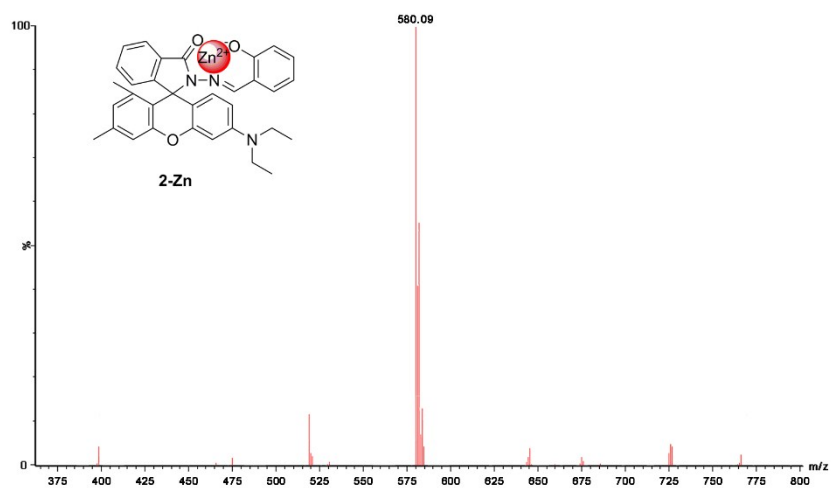

Figure S16. EMI-MS spectra of 2-Zn.

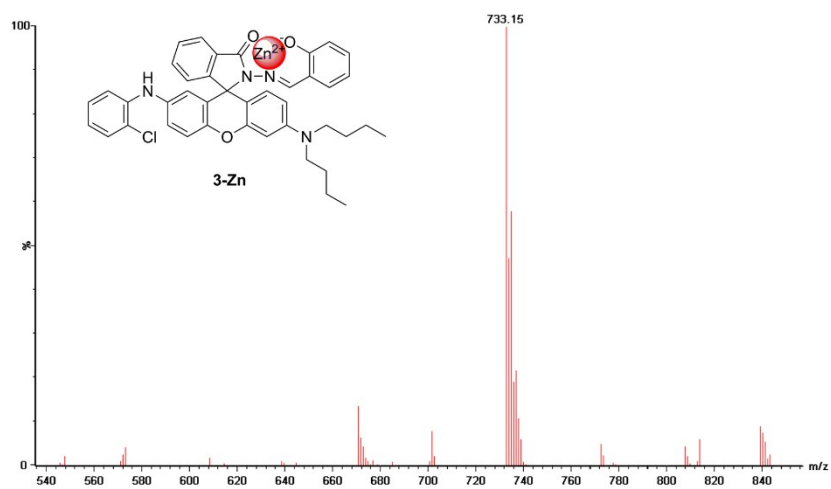

Figure S17. EMI-MS spectra of 3-Zn.

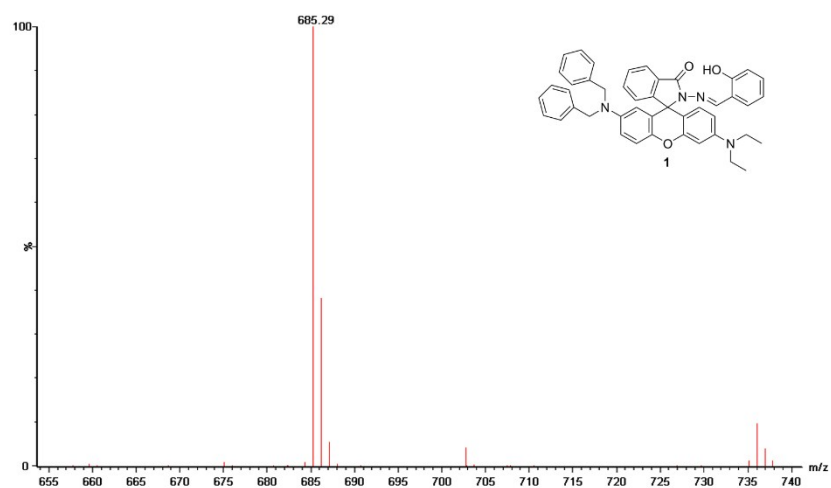

Figure S18. EMI-MS spectra of 1.

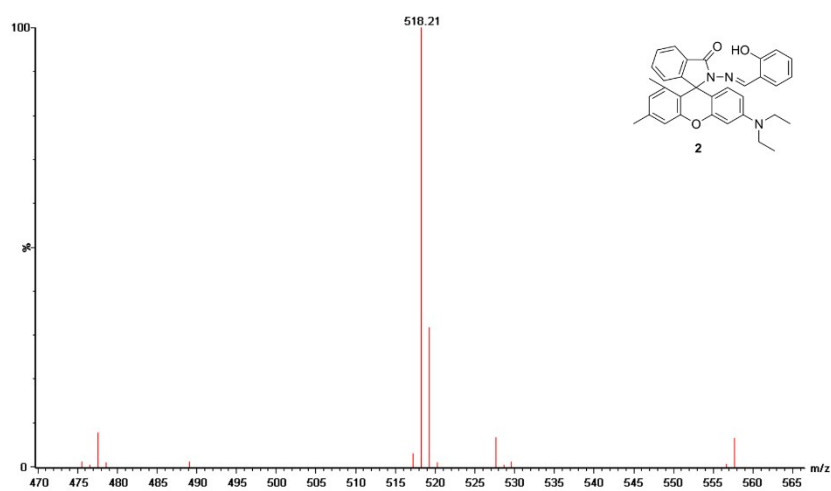

Figure S19. EMI-MS spectra of 2.

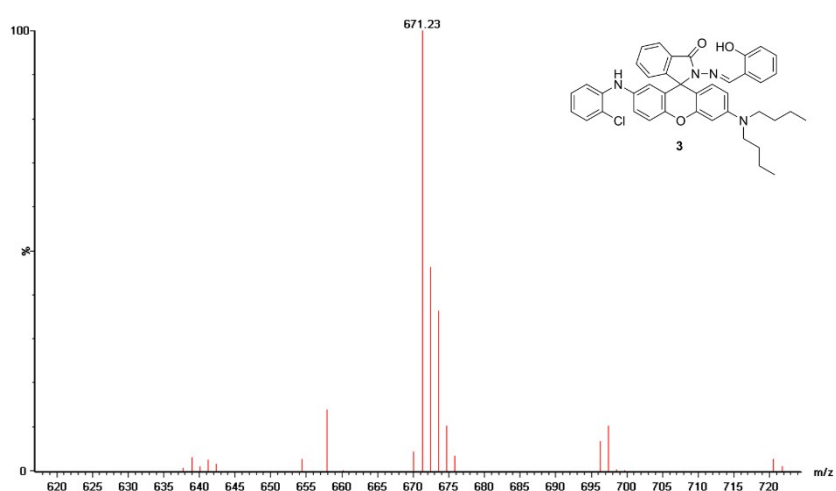

Figure S20. EMI-MS spectra of 3.

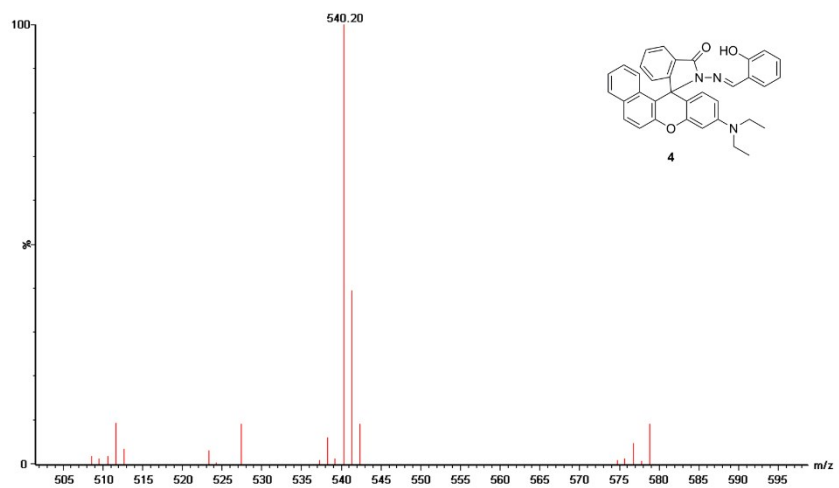

Figure S21. EMI-MS spectra of 4.
